# Supplementary material for: The Effects of Freshwater Clam (Corbicula fluminea) Extract on Serum Tumor Necrosis Factor-Alpha (TNF-α) in Prediabetic Patients in Taiwan
Source: MDPI journal article supplement (doi:10.3390/md20040261), 2022-04-10
Supplement: s1 [file s1]

# Supplementary Information

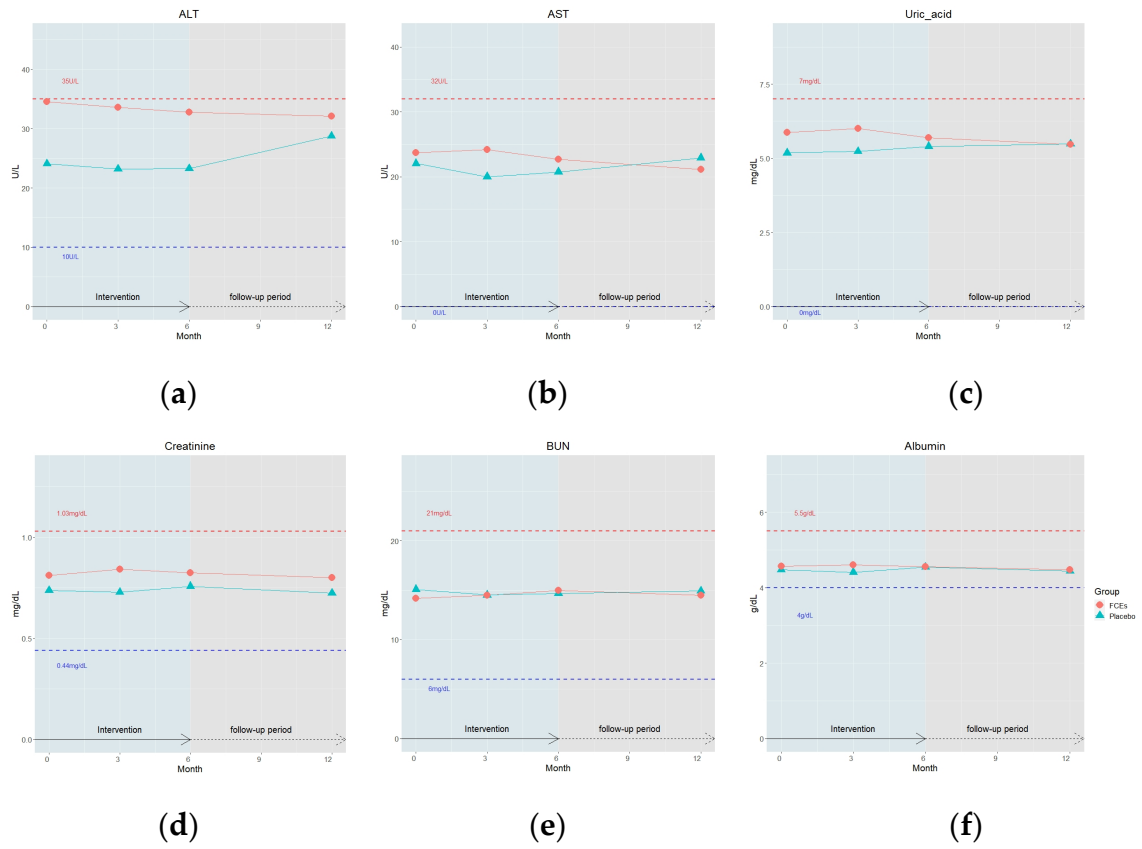

**Figure S1.** Dynamic biochemical data of participants for evaluation of safety and toxicity of FCE powder. Laboratory examinations were performed at 0, 3, 6 and 12 months after start of consumption of FCEs or placebo. (a) ALT (U/L), (b) AST (U/L), and (c) UA (mg/dL) for evaluation of hepatic function did not differ within the 6-month intervention or follow-up period. Renal functions were assessed by (d) CRE (mg/dL) and (e) BUN (mg/dL), and the alteration of these two indicators was also not significant. (f) ALB (g/dL) did not change between these two groups either. The horizontal dashed line shows the reference value. FCEs, freshwater clam extracts; ALT, alanine aminotransferase; AST, aspartate aminotransferase; UA, uric acid; CRE, creatinine; BUN, blood urea nitrogen; ALB, albumin.

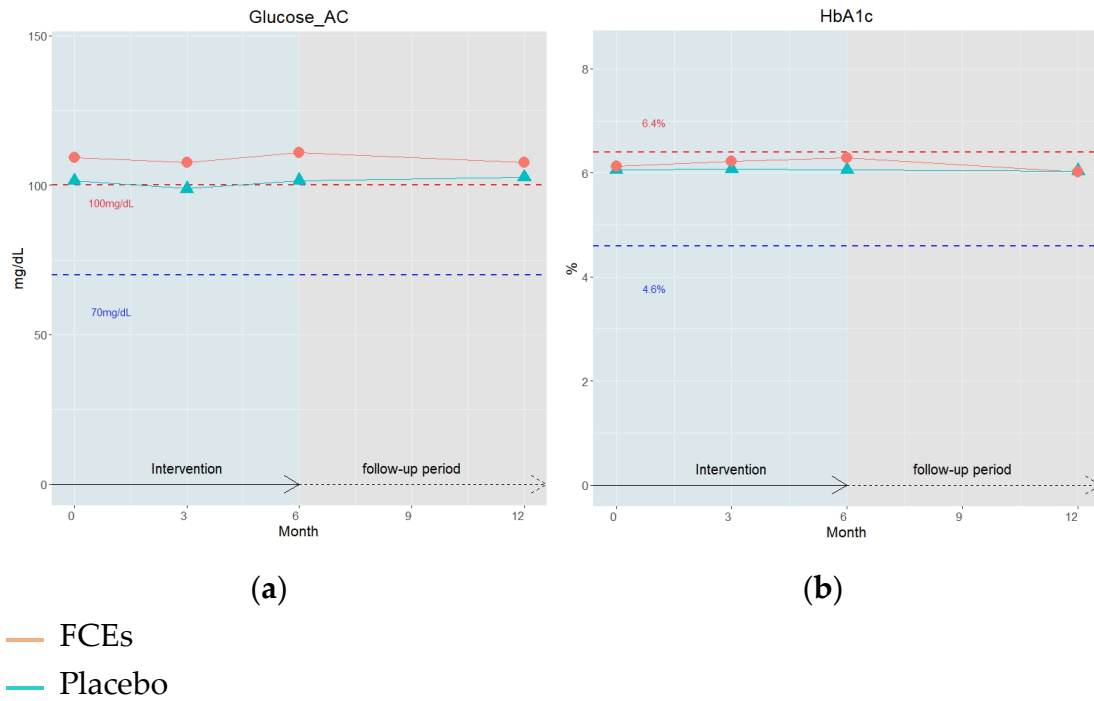

**Figure S2.** Dynamic glucose and HbA1c concentrations of participants for evaluation of FCE powder. Laboratory examinations were performed at 0, 3, 6 and 12 months after start of consumption of FCEs or placebo. **(a)** Glucose (mg/dL) and **(b)** HbA1c (%) did not differ within the 6-month intervention or follow-up period. The horizontal dashed line shows the reference value. FCEs, freshwater clam extracts; HbA1c, glycated hemoglobin.
